# Supplementary material for: Quality Control of the Dietary Supplements Containing Selected Fat-Soluble Vitamins D and K
Source: MDPI journal article supplement (doi:10.3390/nu15071650), 2023-03-28
Supplement: s1 [file s1]

**Table S1.** Optimization of the conditions for the separation of vitamins D<sub>2</sub>, D<sub>3</sub> and K<sub>2</sub>.

| Stationary phase                                                                                                                                                                           | Mobile phase                                    | Developing distance | Observations                                                                                                                                                                                                                   |
|--------------------------------------------------------------------------------------------------------------------------------------------------------------------------------------------|-------------------------------------------------|---------------------|--------------------------------------------------------------------------------------------------------------------------------------------------------------------------------------------------------------------------------|
| TLC Silicagel 60F <sub>254</sub>                                                                                                                                                           | n-hexane - ethyl acetate (9:1, v/v)             | 10 cm<br>15 cm      | no separation                                                                                                                                                                                                                  |
| TLC Silicagel 60F <sub>254</sub> activated with methanol or chloroform                                                                                                                     | n-hexane - ethyl acetate (9:1, v/v)             | 10 cm               | compounds stay on the starting line                                                                                                                                                                                            |
| DC-Silicagel 60 RP-18 F <sub>254S</sub> ;<br>DC-Alufolien Cellulose F                                                                                                                      | 1% $\beta$ -cyclodextrin - methanol (15:1, v/v) | 10 cm               | compounds stay on the starting line                                                                                                                                                                                            |
| DC-Silicagel 60 RP-18 F <sub>254S</sub> activated at 60°C for 2h;<br>DC-Alufolien Cellulose F activated at 60°C for 24h                                                                    | 1% $\beta$ -cyclodextrin - methanol (15:1, v/v) | 10 cm               | compounds stay on the starting line                                                                                                                                                                                            |
| DC-Silicagel 60 RP-18 F <sub>254S</sub>                                                                                                                                                    | n-hexane - ethyl acetate (9:1, v/v)             | 10 cm               | no separation D <sub>2</sub> and D <sub>3</sub>                                                                                                                                                                                |
| DC-Alufolien Cellulose F activated with mixture: 1% $\beta$ -cyclodextrin- methanol (15:1)                                                                                                 | n-hexane - ethyl acetate (9:1, v/v)             | 10 cm               | moving with the eluent                                                                                                                                                                                                         |
| DC-Silicagel 60 RP-18 F <sub>254S</sub> ;<br>DC-Alufolien Cellulose F;<br>TLC Silicagel 60 F <sub>254</sub>                                                                                | 1% $\beta$ -cyclodextrin - methanol (15:1, v/v) | 10 cm               | compounds stay on the starting line                                                                                                                                                                                            |
| DC-Silicagel 60 RP-18 F <sub>254S</sub> ;<br>DC-Alufolien Cellulose F;<br>TLC Silicagel 60 F <sub>254</sub>                                                                                | n-hexane - ethyl acetate (9:1, v/v)             | 10 cm               | no separation                                                                                                                                                                                                                  |
| DC-Alufolien Kieselgur F <sub>254</sub> ;<br>DC-Alufolien Polyamid 11 F <sub>254</sub> ;<br>DC-Alufolien Aluminiunoxid 60 F <sub>254</sub> neutral Typ E                                   | toluene - acetone (1:10, v/v)                   | 10 cm               | moving with the eluent                                                                                                                                                                                                         |
| DC-Alufolien Kieselgur F <sub>254</sub> ;<br>DC-Alufolien Polyamid 11 F <sub>254</sub> ;<br>DC-Alufolien Aluminiunoxid 60 F <sub>254</sub> neutral Typ E                                   | n-hexane - ethyl acetate (9:1, v/v)             | 10 cm               | no separation D <sub>2</sub> and D <sub>3</sub>                                                                                                                                                                                |
| TLC Silicagel 60 F <sub>254</sub> activated with 10% (v/v) paraffin in cyclohexane, dried 10 min at 60°C                                                                                   | methanol - water (19:1, v/v)                    | 10 cm               | D <sub>2</sub> : R <sub>F</sub> 0.63<br>D <sub>3</sub> : R <sub>F</sub> 0.61<br>K <sub>2</sub> : R <sub>F</sub> 0.24<br>D <sub>2</sub> + $\beta$ -CD: R <sub>F</sub> 0.63<br>D <sub>3</sub> + $\beta$ -CD: R <sub>F</sub> 0.59 |
| TLC Silicagel 60 F <sub>254</sub> activated with 10% (v/v) paraffin in cyclohexane, dried 10 min at 60°C                                                                                   | n-hexane - ethyl acetate (9:1, v/v)             | 10 cm               | no separation D <sub>2</sub> and D <sub>3</sub>                                                                                                                                                                                |
| TLC Silicagel 60 F <sub>254</sub> activated with 10% (v/v) paraffin in cyclohexane, dried 10 min at 60°C                                                                                   | 1% $\beta$ -cyclodextrin - methanol (15:1, v/v) | 10 cm               | compounds stay on the starting line                                                                                                                                                                                            |
| TLC Silicagel 60 F <sub>254</sub> activated with 10% (v/v) paraffin in cyclohexane, dried 10 min at 60°C                                                                                   | methanol - water (17:3, v/v);<br>metanol        | 10 cm               | slight differences in R <sub>F</sub> for D <sub>2</sub> and D <sub>3</sub>                                                                                                                                                     |
| TLC Silicagel 60 F <sub>254</sub> activated with 10% (v/v) paraffin in cyclohexane, dried 10 min at 60°C                                                                                   | methanol - 1% $\beta$ -cyclodextrin (19:1, v/v) | 12 cm               | no separation D <sub>2</sub> and D <sub>3</sub>                                                                                                                                                                                |
| TLC Silicagel 60 F <sub>254</sub> activated with 10% (v/v) paraffin in cyclohexane, dried 10 min at 60°C                                                                                   | acetone – glacial acetic acid (3:2, v/v)        | 12 cm               | no separation D <sub>2</sub> and D <sub>3</sub>                                                                                                                                                                                |
| TLC Silicagel 60 F <sub>254S</sub>                                                                                                                                                         | acetone – glacial acetic acid (3:2, v/v)        | 12 cm               | moving with the eluent                                                                                                                                                                                                         |
| TLC Silicagel 60 F <sub>254</sub> activated with 10% (v/v) paraffin in cyclohexane, dried 10 min at 60°C                                                                                   | methanol - water (19:1, v/v)                    | 12, 15, 16, 20 cm   | greater differences in R <sub>F</sub> for D <sub>2</sub> and D <sub>3</sub> than over 10 cm path                                                                                                                               |
| TLC Silicagel 60 F <sub>254</sub> activated with 10% (v/v) paraffin in cyclohexane, dried 10 min at 60°C;<br>TLC Silicagel 60 F <sub>254</sub> ;<br>DC-Silicagel 60 RP-18 F <sub>254</sub> | methanol - water (19:1, v/v)                    | 12 cm               | no separation D <sub>2</sub> and D <sub>3</sub>                                                                                                                                                                                |

|                                                                                                                                                                                            |                                    |       |                                                                                                                      |
|--------------------------------------------------------------------------------------------------------------------------------------------------------------------------------------------|------------------------------------|-------|----------------------------------------------------------------------------------------------------------------------|
| TLC Silicagel 60 F <sub>254</sub> activated with 10% (v/v) paraffin in cyclohexane, dried 10 min at 60°C;<br>TLC Silicagel 60 F <sub>254</sub> ;<br>DC-Silicagel 60 RP-18 F <sub>254</sub> | acetonitrile - methanol (7:3, v/v) | 12 cm | no separation D <sub>2</sub> and D <sub>3</sub>                                                                      |
| TLC Silicagel 60 F <sub>254</sub> activated with 10% (v/v) paraffin in cyclohexane, dried 10 min at 60°C                                                                                   | methanol - water (19:1, v/v)       | 12 cm | D <sub>2</sub> : R <sub>F</sub> 0.58<br>D <sub>3</sub> : R <sub>F</sub> 0.53<br>K <sub>2</sub> : R <sub>F</sub> 0.18 |
